# Supplementary material for: Trends in Beef Intake in the United States: Analysis of the National Health and Nutrition Examination Survey, 2001–2018
Source: MDPI journal article supplement (doi:10.3390/nu15112475), 2023-05-26
Supplement: s1 [file s1]

**Figure S1.** Determination of Red Meat Contribution to Healthy U.S. Style Eating Pattern (HDP) at the 2,000-calorie level

*Step 1. Determine the distribution of individual protein foods in protein food group based on protein item cluster<sup>1,2</sup>*

| <b>Protein Item<br/>Clusters</b> | <b>% of Food group</b> | <b>Ounce eq/day from each protein food<br/>group</b> |
|----------------------------------|------------------------|------------------------------------------------------|
| Eggs                             | 9.20                   | 0.5060                                               |
| High omega fish                  | 2.78                   | 0.1529                                               |
| Low omega fish                   | 6.52                   | 0.3586                                               |
| Nuts/seeds                       | 12.86                  | 0.7073                                               |
| Poultry                          | 29.34                  | 1.6137                                               |
| Red meat                         | 37.29                  | 2.0510                                               |
| Soy                              | 2.01                   | 0.1106                                               |
| <b>TOTAL</b>                     | <b>100.00</b>          | <b>5.50</b>                                          |

<sup>1</sup> Table 4.1: USDA Food Patterns -- Item Clusters, Representative Foods, and Percent of Consumption; in 2020 Dietary Guidelines Advisory Committee and Food Pattern Modeling Team. 2020. Food Pattern Modeling: Ages 2 Years and Older. U.S. Department of Agriculture, Washington, D.C. (Available at [https://www.dietaryguidelines.gov/sites/default/files/2020-07/FoodPatternModeling\\_Report\\_2YearsandOlder.pdf](https://www.dietaryguidelines.gov/sites/default/files/2020-07/FoodPatternModeling_Report_2YearsandOlder.pdf); accessed 23 May 2023)

<sup>2</sup> Protein Foods Subgroup and Item Clusters (Pages 37-41), Data for those 19-70 y (which covers those with 2,000 kcal/day recommendation)

*Step 2. Determine the recommended distribution of Protein Food Subgroups in HDP<sup>2</sup>*

| <b>Protein Food Subgroup</b> | <b>Ounce eq/week</b> | <b>Ounce eq/day</b> |
|------------------------------|----------------------|---------------------|
| Red Meat                     | 12.5                 | 1.8                 |
| Poultry                      | 10.5                 | 1.5                 |
| Eggs                         | 3                    | 0.43                |
| Seafood                      | 8                    | 1.14                |
| Nuts seeds, soy              | 5                    | 0.71                |
| <b>TOTAL PROTEIN FOODS</b>   | <b>39</b>            | <b>5.58</b>         |

<sup>2</sup> Table D14.3. Comparison of food groups and subgroups between the 3 USDA Food Patterns at the 2,000-kcal level; in Dietary Guidelines Advisory Committee. 2020. Scientific Report of the 2020 Dietary Guidelines Advisory Committee: Advisory Report to the Secretary of Agriculture and the Secretary of Health and Human Services. U.S. Department of Agriculture, Agricultural Research Service, Washington DC. (Available at <https://www.dietaryguidelines.gov/2020-advisory-committee-report>; accessed 23 May 2023)

**Table S1.** Per Capita and Beef Consumer Usual Intakes of Beef Based on NHANES 2001 - 2018

| Per Capita Usual Intake of Beef Types, g/day (oz/day; subpopulation size (n)) |                                                 |                                                |                                                |                                                 |                                                |                                                |                                                |                                                |                                                |                                                 |
|-------------------------------------------------------------------------------|-------------------------------------------------|------------------------------------------------|------------------------------------------------|-------------------------------------------------|------------------------------------------------|------------------------------------------------|------------------------------------------------|------------------------------------------------|------------------------------------------------|-------------------------------------------------|
|                                                                               | 2-18 y                                          |                                                |                                                | 19-59 y                                         |                                                |                                                | 60+ y                                          |                                                |                                                | 2+ y                                            |
|                                                                               | All                                             | M                                              | F                                              | All                                             | M                                              | F                                              | All                                            | M                                              | F                                              | All                                             |
| Total Beef                                                                    | 31.90 ± 0.92 g<br>(1.13 ± 0.03 oz;<br>n=10,913) | 36.64 ± 1.26 g<br>(1.29 ± 0.04 oz;<br>n=5,483) | 26.97 ± 0.97 g<br>(0.95 ± 0.03 oz;<br>n=5,430) | 47.14 ± 1.09 g<br>(1.66 ± 0.04 oz;<br>n=13,203) | 60.80 ± 1.66 g<br>(2.14 ± 0.06 oz;<br>n=6,514) | 33.11 ± 1.05 g<br>(1.17 ± 0.04 oz;<br>n=6,689) | 40.73 ± 1.16 g<br>(1.44 ± 0.04 oz;<br>n=6,563) | 51.54 ± 2.08 g<br>(1.82 ± 0.07 oz;<br>n=3,275) | 31.62 ± 1.27 g<br>(1.12 ± 0.04 oz;<br>n=3,288) | 42.23 ± 0.86 g<br>(1.49 ± 0.03 oz;<br>n=30,679) |
| Fresh Lean Beef                                                               | 22.87 ± 0.81 g<br>(0.81 ± 0.03 oz;<br>n=10,913) | 26.17 ± 1.07 g<br>(0.92 ± 0.04 oz;<br>n=5,483) | 19.51 ± 0.79 g<br>(0.69 ± 0.03 oz;<br>n=5,430) | 38.20 ± 1.02 g<br>(1.35 ± 0.04 oz;<br>n=13,203) | 49.02 ± 1.47 g<br>(1.73 ± 0.05 oz;<br>n=6,514) | 27.05 ± 0.98 g<br>(0.95 ± 0.03 oz;<br>n=6,689) | 32.01 ± 1.23 g<br>(1.13 ± 0.04 oz;<br>n=6,563) | 40.33 ± 2.09 g<br>(1.42 ± 0.07 oz;<br>n=3,275) | 25.08 ± 1.15 g<br>(0.88 ± 0.04 oz;<br>n=3,288) | 33.36 ± 0.84 g<br>(1.18 ± 0.03 oz;<br>n=30,679) |
| Processed Beef                                                                | 7.50 ± 0.42 g<br>(0.26 ± 0.01 oz;<br>n=10,913)  | 9.04 ± 0.58 g<br>(0.32 ± 0.02 oz;<br>n=5,483)  | 5.91 ± 0.46 g<br>(0.21 ± 0.02 oz;<br>n=5,430)  | 6.36 ± 0.25 g<br>(0.22 ± 0.01 oz;<br>n=13,203)  | 8.34 ± 0.47 g<br>(0.29 ± 0.02 oz;<br>n=6,514)  | 4.33 ± 0.27 g<br>(0.15 ± 0.01 oz;<br>n=6,689)  | 6.63 ± 0.46 g<br>(0.23 ± 0.02 oz;<br>n=6,563)  | 9.15 ± 0.70 g<br>(0.32 ± 0.02 oz;<br>n=3,275)  | 4.51 ± 0.47 g<br>(0.16 ± 0.02 oz;<br>n=3,288)  | 6.69 ± 0.21 g<br>(0.24 ± 0.01 oz;<br>n=30,679)  |
| Ground Beef                                                                   | 15.97 ± 0.62 g<br>(0.56 ± 0.02 oz;<br>n=10,913) | 18.26 ± 0.86 g<br>(0.64 ± 0.03 oz;<br>n=5,483) | 13.64 ± 0.65 g<br>(0.48 ± 0.02 oz;<br>n=5,430) | 22.70 ± 0.78 g<br>(0.80 ± 0.03 oz;<br>n=13,203) | 28.55 ± 1.04 g<br>(1.01 ± 0.04 oz;<br>n=6,514) | 16.65 ± 0.85 g<br>(0.59 ± 0.03 oz;<br>n=6,689) | 17.13 ± 0.72 g<br>(0.60 ± 0.03 oz;<br>n=6,563) | 20.00 ± 1.20 g<br>(0.71 ± 0.04 oz;<br>n=3,275) | 14.62 ± 0.91 g<br>(0.52 ± 0.03 oz;<br>n=3,288) | 19.97 ± 0.58 g<br>(0.70 ± 0.02 oz;<br>n=30,679) |

| Beef Consumer Usual Intake of Beef Types, g/day (oz/day; subpopulation size (n)) |                                                |                                                |                                                |                                                |                                                 |                                                |                                                |                                                |                                                |                                                 |
|----------------------------------------------------------------------------------|------------------------------------------------|------------------------------------------------|------------------------------------------------|------------------------------------------------|-------------------------------------------------|------------------------------------------------|------------------------------------------------|------------------------------------------------|------------------------------------------------|-------------------------------------------------|
| 2-18 y                                                                           |                                                |                                                |                                                | 19-59 y                                        |                                                 |                                                | 60+ y                                          |                                                |                                                | 2+ y                                            |
|                                                                                  | All                                            | M                                              | F                                              | All                                            | M                                               | F                                              | All                                            | M                                              | F                                              | All                                             |
| Total Beef                                                                       | 61.99 ± 1.65 g<br>(2.19 ± 0.06 oz;<br>n=5,712) | 68.40 ± 2.34 g<br>(2.41 ± 0.08 oz;<br>n=3,017) | 54.51 ± 1.61 g<br>(1.92 ± 0.06 oz;<br>n=2,695) | 91.76 ± 1.19 g<br>(3.24 ± 0.04 oz;<br>n=6,762) | 108.95 ± 1.86 g<br>(2.41 ± 0.08 oz;<br>n=3,639) | 70.20 ± 1.49 g<br>(2.48 ± 0.05 oz;<br>n=3,123) | 84.10 ± 1.61 g<br>(2.97 ± 0.06 oz;<br>n=2,975) | 98.25 ± 3.05 g<br>(3.47 ± 0.11 oz;<br>n=1,591) | 70.40 ± 1.92 g<br>(2.48 ± 0.07 oz;<br>n=1,384) | 83.16 ± 0.94 g<br>(2.93 ± 0.03 oz;<br>n=15,449) |
| Fresh Lean Beef                                                                  | 64.23 ± 1.77 g<br>(2.27 ± 0.06 oz;<br>n=3,928) | 71.20 ± 2.75 g<br>(2.51 ± 0.10 oz;<br>n=2,066) | 55.92 ± 1.85 g<br>(1.97 ± 0.07 oz;<br>n=1,862) | 91.21 ± 1.41 g<br>(3.22 ± 0.05 oz;<br>n=5,551) | 107.43 ± 2.04 g<br>(3.79 ± 0.07 oz;<br>n=2,994) | 70.61 ± 1.54 g<br>(2.49 ± 0.05 oz;<br>n=2,557) | 80.85 ± 1.90 g<br>(2.85 ± 0.07 oz;<br>n=2,397) | 95.23 ± 3.24 g<br>(3.36 ± 0.11 oz;<br>n=1,269) | 67.32 ± 2.11 g<br>(2.37 ± 0.07 oz;<br>n=1,128) | 83.37 ± 1.04 g<br>(2.94 ± 0.04 oz;<br>n=11,876) |
| Processed Beef                                                                   | 30.83 ± 1.38 g<br>(1.09 ± 0.05 oz;<br>n=2,710) | 33.90 ± 1.65 g<br>(1.20 ± 0.06 oz;<br>n=1,481) | 26.64 ± 1.74 g<br>(0.94 ± 0.06 oz;<br>n=1,229) | 38.77 ± 1.63 g<br>(1.37 ± 0.06 oz;<br>n=2,129) | 45.00 ± 2.22 g<br>(1.59 ± 0.08 oz;<br>n=1,216)  | 30.44 ± 1.69 g<br>(1.07 ± 0.06 oz;<br>n=913)   | 48.09 ± 2.94 g<br>(1.70 ± 0.10 oz;<br>n=888)   | 56.18 ± 3.61 g<br>(1.98 ± 0.13 oz;<br>n=503)   | 38.25 ± 3.55 g<br>(1.35 ± 0.13 oz;<br>n=385)   | 37.71 ± 1.22 g<br>(1.33 ± 0.04 oz;<br>n=5,727)  |
| Ground Beef                                                                      | 57.29 ± 1.48 g<br>(2.02 ± 0.05 oz;<br>n=3,034) | 62.90 ± 2.42 g<br>(2.22 ± 0.09 oz;<br>n=1,615) | 50.53 ± 1.76 g<br>(1.78 ± 0.06 oz;<br>n=1,419) | 76.59 ± 2.38 g<br>(2.70 ± 0.08 oz;<br>n=3,751) | 89.51 ± 3.89 g<br>(3.16 ± 0.14 oz;<br>n=2,008)  | 61.11 ± 1.93 g<br>(2.16 ± 0.07 oz;<br>n=1,743) | 71.49 ± 2.98 g<br>(2.52 ± 0.10 oz;<br>n=1,448) | 81.68 ± 4.71 g<br>(2.88 ± 0.17 oz;<br>n=778)   | 61.94 ± 2.83 g<br>(2.18 ± 0.10 oz;<br>n=670)   | 71.16 ± 1.79 g<br>(2.51 ± 0.06 oz;<br>n=8,233)  |

**Table S2.** Day 1 Mean Intake of Total Ground Beef and Ground Beef From Fast Food Sources By Americans, Gender Combined – NHANES 2011-2018.

|             | <b>Per Capita Intake, g/day (oz/day; subpopulation size (n))</b> |                                               | <b>Beef Consumer Intake, g/day (oz/day; subpopulation size (n))</b> |                                            |
|-------------|------------------------------------------------------------------|-----------------------------------------------|---------------------------------------------------------------------|--------------------------------------------|
|             | Ground Beef                                                      | Ground Beef from Fast Food                    | Ground Beef                                                         | Ground Beef from Fast Food                 |
| 2-18 years  | 16.1 ± 0.7 g<br>(0.6 ± 0.02 oz;<br>n=10,913)                     | 4.6 ± 0.3 g<br>(0.2 ± 0.01 oz;<br>n=10,913)   | 56.98 ± 1.5 g<br>(2.0 ± 0.05 oz;<br>n=3,034)                        | 60.5 ± 2.5 g<br>(2.1 ± 0.1 oz;<br>n=930)   |
| 19-59 years | 22.9 ± 0.8 g<br>(0.8 ± 0.03 oz;<br>n=13,203)                     | 8.05 ± 0.43 g<br>(0.3 ± 0.02 oz;<br>n=13,202) | 76.9 ± 1.5 g<br>(2.7 ± 0.1 oz;<br>n=3,751)                          | 74.4 ± 2.0 g<br>(2.6 ± 0.1 oz;<br>n=1,463) |
| 60+ years   | 17.08 ± 1.01 g<br>(0.6 ± 0.04 oz;<br>n=6,563)                    | 3.76 ± 0.35 g<br>(0.1 ± 0.01 oz;<br>n=6,559)  | 70.2 ± 2.4 g<br>(2.5 ± 0.1 oz;<br>n=1,448)                          | 65.6 ± 4.2 g<br>(2.3 ± 0.2 oz;<br>n=404)   |
